# Supplementary material for: Peroxiredoxin 2 is highly expressed in human oral squamous cell carcinoma cells and is upregulated by human papillomavirus oncoproteins and arecoline, promoting proliferation
Source: PubMed Central journal article supplement (PMC7746188; doi:10.1371/journal.pone.0242465), 2020-12-17
Supplement: pone.0242465.s009.pdf [file pone.0242465.s009.pdf]

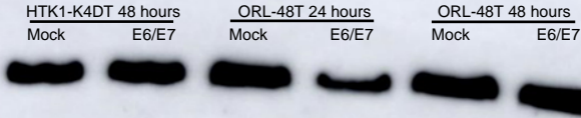

**Fig 2 Beta-actin**

HTK1-K4DT 48 hours

Mock

E6/E7

ORL-48T 24 hours

Mock

E6/E7

ORL-48T 48 hours

Mock

E6/E7

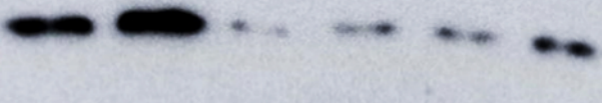

**Fig 2 PRDX2**

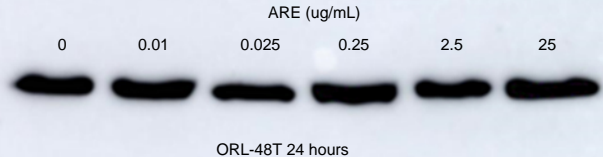

**Fig 3 Beta-actin**

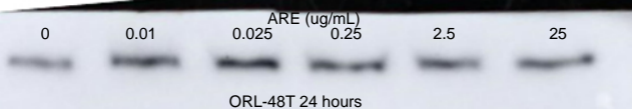

**Fig 3 PRDX2**

ARE (ug/mL)

0

0.01

0.025

0.25

2.5

25

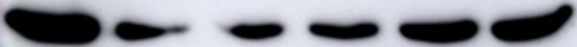

ORL-48T 48 hours

**Fig 3 Beta-actin**

0

0.01

0.025

0.25

2.5

25

ARE (ug/mL)

ORL-48T 48 hours

**Fig 3 PRDX2**

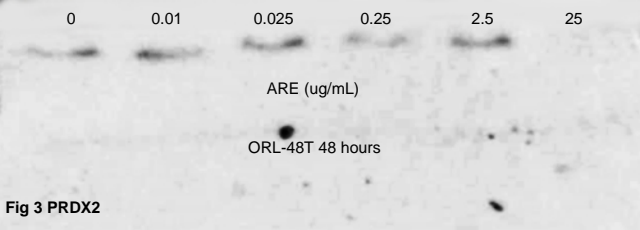

ARE (ug/mL)

0

0.01

0.025

0.25

2.5

25

HTK1-K4DT 24 hours

**Fig 3 Beta-actin**

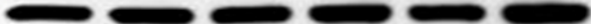

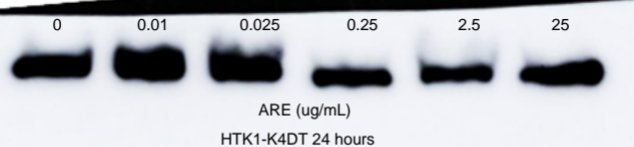

**Fig 3 PRDX2**



ORL-48T

Non-transduced cell

pCLXSN

pCLXSN-PRDX2

**Fig 4 Beta-actin**



ORL-48T

Non-transduced cell

pCLXSN

pCLXSN-PRDX2

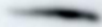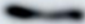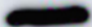

**Fig 4 PRDX2**

24 hours

48 hours

HTK1-K4DT

16E6

HTK1-K4DT

16E6

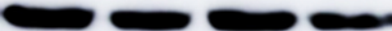

**S1 Fig Beta-actin**

24 hours

48 hours

HTK1-K4DT

16E6

HTK1-K4DT

16E6

S1 Fig PRDX2

ORL-48T

Non-transfected cell siR-Con

siR-PRDX2

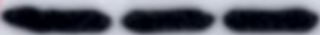

**S2 Fig Beta-actin**

ORL-48T

Non-transfected cell siR-Con

siR-PRDX2

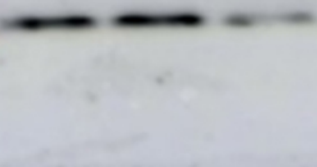

**S2 Fig PRDX2**
